# Supplementary material for: Free-standing, flexible thermochromic films based on one-dimensional magnetic photonic crystals
Source: Royal Society of Chemistry journal article supplement (doi:10.1039/c4tc02870h), 2015-01-01
Supplement: c4tc02870h1.pdf [file c4tc02870h1.pdf]

## Supplementary materials for “Free-standing, flexible thermochromic films based on one-dimensional magnetic photonic crystals”

Huiru Ma<sup>a,b</sup>, Mingxing Zhu<sup>b</sup>, Wei Luo<sup>a</sup>, Wei Li<sup>a</sup>, Kai Fang<sup>a</sup>, Fangzhi Mou<sup>a</sup>, Jianguo Guan<sup>\*a</sup>

<sup>a</sup> State Key Laboratory of Advanced Technology for Materials Synthesis and Processing, Wuhan University of Technology, Wuhan 430070, China.

<sup>b</sup> Department of Chemistry, School of Chemistry, Chemical Engineering and Life Science, Wuhan University of Technology, Wuhan 430070, China

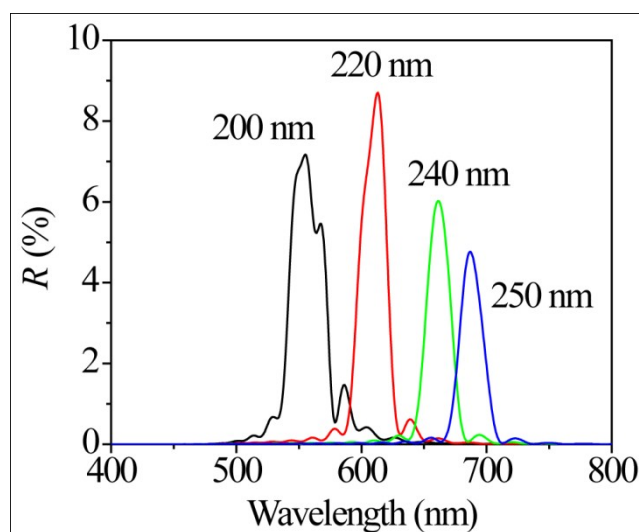

**Fig. S1** Simulated reflection spectra of a tetragonal column structure containing a single photonic crystal chain with different neighboring interparticle distances. The particle diameter is 150 nm. Particle number is 30, corresponding to the chain length from 6.0 to 7.5  $\mu\text{m}$ .

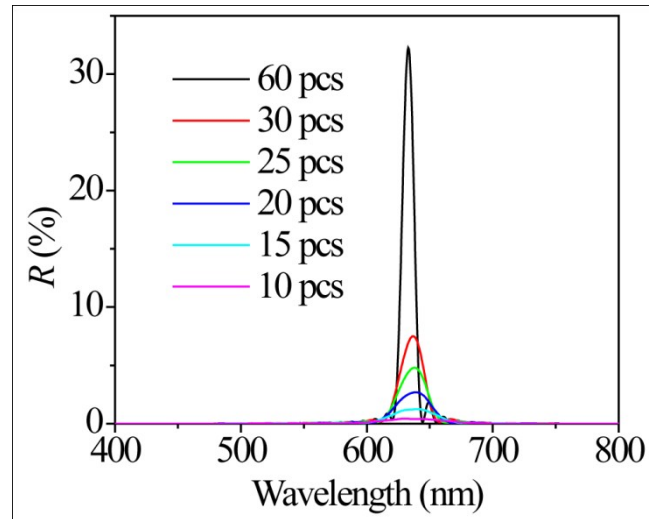

**Fig. S2** Reflection spectra of a tetragonal column structure containing a single photonic crystal chain whose particle number varies from 10 to 60, corresponding to the chain length from 2.5 to 15  $\mu\text{m}$ . The particle diameter is 150 nm. The distances between the neighboring particles are all 230 nm.
